# Supplementary material for: The Effectiveness of Financial Incentives for Health Behaviour Change: Systematic Review and Meta-Analysis
Source: PubMed Central journal article supplement (PMC3949711; doi:10.1371/journal.pone.0090347), 2014-03-11
Supplement: pone.0090347.s003.pdf [file pone.0090347.s003.pdf]

**Table S1 Inclusion criteria**

| <b>Study component</b> | <b>Inclusion criteria</b>                                                                                                                                                                                                         |
|------------------------|-----------------------------------------------------------------------------------------------------------------------------------------------------------------------------------------------------------------------------------|
| Study design           | Randomized controlled trials, cluster randomized controlled trials, controlled before and after studies or interrupted time series analyses                                                                                       |
| Publication language   | All languages (English language title and abstract)                                                                                                                                                                               |
| Population             | Non-clinical, adult (at least 50% of the sample aged 18 years or above) populations, living in high-income economies (those with a Gross National Income of \$12,276 or more per capita in 2010, as identified by the World Bank) |
| Intervention           | Financial incentives: cash, cash-like rewards, or penalties contingent on behaviour change or non-change                                                                                                                          |
| Target behaviours      | Smoking cessation, physical activity, alcohol consumption, safe sun behaviours, safe sex behaviours, healthy food behaviours, attendance for screening or vaccination                                                             |
| Comparators            | Usual care, no intervention                                                                                                                                                                                                       |
| Outcome measures       | Objective or validated self-reported measures                                                                                                                                                                                     |
