# Supplementary material for: The Effectiveness of Financial Incentives for Health Behaviour Change: Systematic Review and Meta-Analysis
Source: PubMed Central journal article supplement (PMC3949711; doi:10.1371/journal.pone.0090347), 2014-03-11
Supplement: pone.0090347.s004.pdf [file pone.0090347.s004.pdf]

Table S2 Characteristics of included studies

| Paper                              | Participants recruited                                                                                                          | Incentive intervention                                                                                                                                                                                                                                                                                                                                                                                                                                                                             | Additional intervention arms | Comparator                                   | Outcome & measurement                                                                                      | Study design & follow-ups (from baseline)                                                                                                                                     | Results                                                                                                                                                                                                                                                                                                |
|------------------------------------|---------------------------------------------------------------------------------------------------------------------------------|----------------------------------------------------------------------------------------------------------------------------------------------------------------------------------------------------------------------------------------------------------------------------------------------------------------------------------------------------------------------------------------------------------------------------------------------------------------------------------------------------|------------------------------|----------------------------------------------|------------------------------------------------------------------------------------------------------------|-------------------------------------------------------------------------------------------------------------------------------------------------------------------------------|--------------------------------------------------------------------------------------------------------------------------------------------------------------------------------------------------------------------------------------------------------------------------------------------------------|
| <b>Smoking Cessation</b>           |                                                                                                                                 |                                                                                                                                                                                                                                                                                                                                                                                                                                                                                                    |                              |                                              |                                                                                                            |                                                                                                                                                                               |                                                                                                                                                                                                                                                                                                        |
| Donatelle et al 2000 <sup>48</sup> | Pregnant women cigarette smokers living in Oregon, USA aged 15 years or older; 112 in intervention group, 108 in control group. | <p><i>Direction:</i> reward</p> <p><i>Form:</i> vouchers for restricted range of goods/services (unknown voucher types)</p> <p><i>Magnitude (Total maximum value of incentive payments 2011 \$US):</i> \$653</p> <p><i>Certainty:</i> certain</p> <p><i>Target:</i> outcome (voucher for biochemical evidence of smoking cessation)</p> <p><i>Frequency:</i> some instances incentive (when cessation confirmed)</p> <p><i>Immediacy:</i> at baseline, eight months gestation &amp; two months</p> | None                         | Usual care (smoking cessation self-help kit) | Smoking cessation measured using salivary cotinine <30ng/ml confirmed with salivary thiocyanate <100ug/ml. | Two-arm RCT with follow-ups at 8 months gestation (105 in intervention group, 102 in control group); and 2 months post-partum (103 in incentive group, 102 in control group). | Smoking cessation significantly higher in intervention vs. control group at 8 months gestation and 2 months post-partum. Smoking cessation rate at 8-months gestation 32% in intervention group vs. 9% in control group (p<0.0001). Smoking cessation rate at 2-months post-partum 21% in intervention |

|                                  |                                                                                                         |                                                                                                                                                                                                                                                                                                                                                                                                                                                               |      |                 |                                                    |                                                                                                                                                                                                |                                                                                                                                                                                                                                                                                  |
|----------------------------------|---------------------------------------------------------------------------------------------------------|---------------------------------------------------------------------------------------------------------------------------------------------------------------------------------------------------------------------------------------------------------------------------------------------------------------------------------------------------------------------------------------------------------------------------------------------------------------|------|-----------------|----------------------------------------------------|------------------------------------------------------------------------------------------------------------------------------------------------------------------------------------------------|----------------------------------------------------------------------------------------------------------------------------------------------------------------------------------------------------------------------------------------------------------------------------------|
|                                  |                                                                                                         | <p>postpartum</p> <p><i>Schedule:</i> fixed</p> <p><i>Recipient:</i> individuals</p> <p><i>Recruitment setting:</i> community</p> <p><i>Delivery setting:</i> community</p> <p><i>Length of intervention from baseline:</i> up to 10 months</p>                                                                                                                                                                                                               |      |                 |                                                    |                                                                                                                                                                                                | group and 6% in control group (<0.001).                                                                                                                                                                                                                                          |
| Glasgow et al 1993 <sup>50</sup> | Adult smokers living in Salem & Portland, Oregon, USA; 474 in intervention group, 623 in control group. | <p><i>Direction:</i> reward</p> <p><i>Form:</i> cash (for certain component) &amp; specific goods/services (for uncertain change component)</p> <p><i>Magnitude (Total maximum value of incentive payments 2011 \$US):</i> \$187 (certain component), at least \$965 (chance component)</p> <p><i>Certainty:</i> certain &amp; uncertain chance</p> <p><i>Target:</i> outcome (cash for biochemical evidence of smoking cessation plus entry into monthly</p> | None | No intervention | Smoking cessation measured using expired CO <9ppm. | Two-arm cluster RCT, with clustering of workplaces, with follow-ups at 12 months (381 in intervention group, 475 in control group) and at 24 months (344 in intervention group, 426 in control | No difference in smoking cessation between intervention and control group at 12 or 24 months. Smoking cessation rate at 12 months 11% in intervention group vs. 12% in control (p>0.05). Smoking cessation rate at 24 months 14% in intervention group and 12% in control group. |

|                                          |                                                                                                                           |                                                                                                                                                                                                                                                                                                                                                                                          |                                                                                             |                               |                                                                                      |                                                                                                                                  |                                                                                                                                                                                      |
|------------------------------------------|---------------------------------------------------------------------------------------------------------------------------|------------------------------------------------------------------------------------------------------------------------------------------------------------------------------------------------------------------------------------------------------------------------------------------------------------------------------------------------------------------------------------------|---------------------------------------------------------------------------------------------|-------------------------------|--------------------------------------------------------------------------------------|----------------------------------------------------------------------------------------------------------------------------------|--------------------------------------------------------------------------------------------------------------------------------------------------------------------------------------|
|                                          |                                                                                                                           | <p>sweepstakes)</p> <p><i>Frequency:</i> some instances incentivised (when cessation confirmed)</p> <p><i>Immediacy:</i> at monthly check-in meetings</p> <p><i>Schedule:</i> fixed</p> <p><i>Recipient:</i> individuals</p> <p><i>Recruitment setting:</i> workplace</p> <p><i>Delivery setting:</i> workplace</p> <p><i>Length of intervention period from baseline:</i> 12 months</p> |                                                                                             |                               |                                                                                      | group).                                                                                                                          |                                                                                                                                                                                      |
| Jason et al 1995; 1997 <sup>51, 52</sup> | Adult smokers living in Chicago, USA; 283 in incentive plus group sessions, 281 in incentive only intervention group, 280 | <p><i>Direction:</i> reward</p> <p><i>Form:</i> cash</p> <p><i>Magnitude (Total maximum value of incentive payments 2011 \$US):</i> \$245</p> <p><i>Certainty:</i> certain</p> <p><i>Target:</i> outcome</p> <p><i>Frequency:</i> some instances incentivised (each day abstinent)</p>                                                                                                   | Two intervention arms: incentives alone (group 1); incentive plus group sessions (group 2). | Usual care (self-help manual) | Smoking cessation measured using expired CO <9ppm, confirmed with salivary cotinine. | Three-arm cluster RCT, with clustering of workplaces, with follow-up at 6, 12, 18 and 24 months; those lost to follow up assumed | Smoking cessation significantly higher in group 2 vs. group 1; and group 1 vs. control group. Smoking cessation rate at 6 months 25% in group 2 vs. 10% in group 1 vs. 4% in control |

|                            |                                   |                                                                                                                                                                                                                                                                      |      |                                              |                                           |                                            |                                                                                                                                                                                                                                                                                                                                                                                                               |
|----------------------------|-----------------------------------|----------------------------------------------------------------------------------------------------------------------------------------------------------------------------------------------------------------------------------------------------------------------|------|----------------------------------------------|-------------------------------------------|--------------------------------------------|---------------------------------------------------------------------------------------------------------------------------------------------------------------------------------------------------------------------------------------------------------------------------------------------------------------------------------------------------------------------------------------------------------------|
|                            | in (self-help) control group.     | <i>Immediacy:</i> unclear<br><i>Schedule:</i> fixed<br><i>Recipient:</i> individuals<br><i>Recruitment setting:</i> workplace<br><i>Delivery setting:</i> workplace<br><i>Length of intervention period from baseline:</i> initial 3 week period, then over 6 months |      |                                              |                                           | not to have quit.                          | group (p<0.001).<br>Smoking cessation rate at 12 months 21% in group 2 vs. 10% in group 1 vs. 7% in control group (p<0.001).<br>Smoking cessation rate at 18 months 16% in group 2 vs. 12% in group 1 vs. 7% in control group (p value reported as not significant).<br>Smoking cessation rate at 24 months 18% in group 2 vs. 13% in group 1 vs. 10% in control group (p value reported as not significant). |
| Jeffery 1990 <sup>53</sup> | Adult smokers living in Minnesota | <i>Direction:</i> penalty<br><i>Form:</i> cash<br><i>Magnitude (Total maximum value of</i>                                                                                                                                                                           | None | Usual care (newsletter on smoking cessation) | Smoking cessation measured using salivary | Two-arm RCT, with follow-up at 6 months (6 | Smoking cessation higher in intervention vs. control group.                                                                                                                                                                                                                                                                                                                                                   |

|                                  |                                                                |                                                                                                                                                                                                                                                                                                                                                                                                                                                                               |      |                 |                                                               |                                                                  |                                                                                                                          |
|----------------------------------|----------------------------------------------------------------|-------------------------------------------------------------------------------------------------------------------------------------------------------------------------------------------------------------------------------------------------------------------------------------------------------------------------------------------------------------------------------------------------------------------------------------------------------------------------------|------|-----------------|---------------------------------------------------------------|------------------------------------------------------------------|--------------------------------------------------------------------------------------------------------------------------|
|                                  | USA; 133 in intervention group, 9 in control group.            | <i>incentive deductions 2011 \$US): \$103</i><br><i>Certainty: certain</i><br><i>Target: outcome</i><br><i>Frequency: some instances incentivised (each month abstinent)</i><br><i>Immediacy: at the end of the 6-month program</i><br><i>Schedule: fixed</i><br><i>Recipient: individuals</i><br><i>Recruitment setting: community – not workplace</i><br><i>Delivery setting: community – not workplace</i><br><i>Length of intervention period from baseline: 6 months</i> |      |                 | cotinine <11ng/ml                                             | in intervention group, 118 in control group).                    | No tests of significance reported. Smoking cessation rate at 6 months 20% in intervention group vs. 9% in control group. |
| Jeffery et al 1993 <sup>54</sup> | Adult smokers living in Minneapolis, USA; 9549 in intervention | <i>Direction: penalty</i><br><i>Form: cash</i><br><i>Magnitude (Total value of incentive deductions 2011 \$US): \$342</i><br><i>Certainty: certain</i>                                                                                                                                                                                                                                                                                                                        | None | No intervention | Smoking cessation measured using expired CO <8ppm, confirmed. | Two-arm cluster RCT, with clustering of workplaces, with follow- | Smoking cessation higher in control vs. intervention group. Smoking cessation rate at                                    |

|                                        |                                                                                                                  |                                                                                                                                                                                                                                                                                                                                                                                                          |                                                                                    |                 |                                                                                          |                                                                                            |                                                                                                                                                          |
|----------------------------------------|------------------------------------------------------------------------------------------------------------------|----------------------------------------------------------------------------------------------------------------------------------------------------------------------------------------------------------------------------------------------------------------------------------------------------------------------------------------------------------------------------------------------------------|------------------------------------------------------------------------------------|-----------------|------------------------------------------------------------------------------------------|--------------------------------------------------------------------------------------------|----------------------------------------------------------------------------------------------------------------------------------------------------------|
|                                        | group, 10322 in control group.                                                                                   | <p><i>Target:</i> outcome</p> <p><i>Frequency:</i> some instances incentivised (when cessation confirmed)</p> <p><i>Immediacy:</i> immediately</p> <p><i>Schedule:</i> fixed</p> <p><i>Recipient:</i> individual</p> <p><i>Recruitment setting:</i> community – workplace</p> <p><i>Delivery setting:</i> community – workplace</p> <p><i>Length of intervention period from baseline:</i> 24 months</p> |                                                                                    |                 |                                                                                          | up at 24 months; those lost to follow up assumed not to have quit.                         | 24 months<br>21.71% in intervention vs. 22.82% in control group.                                                                                         |
| Stitzer and Bigelow 1983 <sup>59</sup> | Adult smokers; 14 in intervention group 1, 16 in intervention group 2, 14 in intervention group 3, 15 in control | <p><i>Direction:</i> reward</p> <p><i>Form:</i> cash</p> <p><i>Magnitude (Total value of incentive payments 2011 \$US):</i> \$22.60-\$226 (depending on intervention group)</p> <p><i>Certainty:</i> certain</p> <p><i>Target:</i> outcome</p> <p><i>Frequency:</i> some instances incentivised</p>                                                                                                      | Three intervention arms: \$1/day (group 1), \$5/day (group 2), \$10/day (group 3). | No intervention | Smoking cessation using a CO cut-off based on 50% of average baseline smoking behaviour. | Four-arm RCT, with follow-up at 4 weeks; those lost to follow up assumed not to have quit. | The adjusted average number of daytime cigarettes decreased as incentives increase, p<0.001. Success at meeting smoking targets: 28.6% in group 1, 56.3% |

|                                        |                                                                                           |                                                                                                                                                                                                                                                                                                                                                |                                                                                                           |                 |                                                                |                                                                                             |                                                                                                                                                                                                          |
|----------------------------------------|-------------------------------------------------------------------------------------------|------------------------------------------------------------------------------------------------------------------------------------------------------------------------------------------------------------------------------------------------------------------------------------------------------------------------------------------------|-----------------------------------------------------------------------------------------------------------|-----------------|----------------------------------------------------------------|---------------------------------------------------------------------------------------------|----------------------------------------------------------------------------------------------------------------------------------------------------------------------------------------------------------|
|                                        | group.                                                                                    | (each day abstinent)<br><i>Immediacy:</i> immediately<br><i>Schedule:</i> fixed<br><i>Recipient:</i> individual<br><i>Recruitment setting:</i> community – workplace<br><i>Delivery setting:</i> community –workplace<br><i>Length of intervention period from baseline:</i> 2 weeks                                                           |                                                                                                           |                 |                                                                |                                                                                             | in group 2, 78.6% in group 3 and 6.7% in control group.                                                                                                                                                  |
| Stitzer and Bigelow 1985 <sup>60</sup> | Adult smokers; 11 in intervention group 1, 8 in intervention group 2, 9 in control group. | <i>Direction:</i> reward<br><i>Form:</i> cash<br><i>Magnitude (Total value of incentive payments 2011 \$US):</i> \$105<br><i>Certainty:</i> certain<br><i>Target:</i> outcome<br><i>Frequency:</i> some instances incentivised (each day abstinent)<br><i>Immediacy:</i> immediately<br><i>Schedule:</i> fixed<br><i>Recipient:</i> individual | Two intervention arms: \$5/day for CO readings <8ppm (group 1), \$5/day for CO readings <16ppm (group 2). | No intervention | Smoking cessation using CO cut-off points of <8ppm and <16ppm. | Three-arm RCT, with follow-up at 4 weeks; those lost to follow up assumed not to have quit. | Smoking cessation significantly higher in the group 1 vs. group 2 or control group (p<0.003). Success at meeting smoking cessation targets: 45.5% in group 1, 87.5% in group 2, and 0% in control group. |

|                                |                                                                                           |                                                                                                                                                                                                                                                                                                                                                                                                                                                                                                  |      |            |                                                               |                                                                                                         |                                                                                                                                                                                                                                                                                       |
|--------------------------------|-------------------------------------------------------------------------------------------|--------------------------------------------------------------------------------------------------------------------------------------------------------------------------------------------------------------------------------------------------------------------------------------------------------------------------------------------------------------------------------------------------------------------------------------------------------------------------------------------------|------|------------|---------------------------------------------------------------|---------------------------------------------------------------------------------------------------------|---------------------------------------------------------------------------------------------------------------------------------------------------------------------------------------------------------------------------------------------------------------------------------------|
|                                |                                                                                           | <p><i>Recruitment setting:</i> community – workplace</p> <p><i>Delivery setting:</i> community - workplace</p> <p><i>Length of intervention period from baseline:</i> 2 weeks</p>                                                                                                                                                                                                                                                                                                                |      |            |                                                               |                                                                                                         |                                                                                                                                                                                                                                                                                       |
| Volpp et al 2006 <sup>61</sup> | Adult smokers living in Philadelphia, USA; 92 in intervention group, 87 in control group. | <p><i>Direction:</i> reward</p> <p><i>Form:</i> cash</p> <p><i>Magnitude (Total value of incentive payments 2011 \$US):</i> \$223</p> <p><i>Certainty:</i> certain</p> <p><i>Target:</i> process (attendance at sessions) &amp; outcome (for cessation)</p> <p><i>Frequency:</i> some instances incentivised (when cessation confirmed)</p> <p><i>Immediacy:</i> immediately</p> <p><i>Schedule:</i> fixed</p> <p><i>Recipient:</i> individual</p> <p><i>Recruitment setting:</i> outpatient</p> | None | Usual care | Smoking cessation verified by urine cotinine test <500 ug/ml. | Two-arm RCT, with follow-up at 14 weeks and 36 weeks; those lost to follow up assumed not to have quit. | Smoking cessation significantly higher at 30-days in intervention vs. control group (p=0.01). No difference at 6 months (p=0.57). Smoking cessation 16.3% in intervention group, 4.6% in control group at 30-days; and 6.5% in intervention group, 4.6% in control group at 6 months. |



|                                |                                                                                   |                                                                                                                                                                                                                                                                                                                                                                                                                                                                                                                       |      |            |                                                                                             |                                                                                                                                     |                                                                                                                                                                                                                                                                                                                                                                         |
|--------------------------------|-----------------------------------------------------------------------------------|-----------------------------------------------------------------------------------------------------------------------------------------------------------------------------------------------------------------------------------------------------------------------------------------------------------------------------------------------------------------------------------------------------------------------------------------------------------------------------------------------------------------------|------|------------|---------------------------------------------------------------------------------------------|-------------------------------------------------------------------------------------------------------------------------------------|-------------------------------------------------------------------------------------------------------------------------------------------------------------------------------------------------------------------------------------------------------------------------------------------------------------------------------------------------------------------------|
|                                |                                                                                   | <i>Delivery setting:</i><br>outpatient<br><i>Length of intervention period from baseline:</i><br>10 weeks                                                                                                                                                                                                                                                                                                                                                                                                             |      |            |                                                                                             |                                                                                                                                     |                                                                                                                                                                                                                                                                                                                                                                         |
| Volpp et al 2009 <sup>62</sup> | Adult smokers, living in the US; 436 in intervention group, 442 in control group. | <i>Direction:</i> reward<br><i>Form:</i> cash<br><i>Magnitude (Total value of incentive payments 2011 \$US):</i> \$786<br><i>Certainty:</i> certain<br><i>Target:</i> process (sessions, participation & samples) & outcome (cessation)<br><i>Frequency:</i> some instances incentivised (when cessation confirmed)<br><i>Immediacy:</i> immediately<br><i>Schedule:</i> fixed<br><i>Recipient:</i> individual<br><i>Recruitment setting:</i> community – workplace<br><i>Delivery setting:</i> community – workplace | None | Usual care | Smoking cessation verified by saliva cotinine measure of <15ng/ml or urine cotinine <2ng/ml | Two-arm RCT, with follow-up at 3 or 6 months, 9 or 12 months and 15 or 18 months; those lost to follow up assumed not to have quit. | Smoking cessation significantly higher in intervention vs. control group. Cessation at 3 or 6 months was 20.9% in the intervention group, vs. 11.8% in the control group (p<0.001); at 9 or 12 months 14.7% in the intervention group vs. 5% in the control group (p<0.001); at 15 or 18 months 9.4% in the intervention group vs. 3.6% in the control group (p<0.001). |

|                               |                                                                                                                          |                                                                                                                                                                                                                                                                                                                                                                                                                                                                                                                                                                                                |                                                                                                                                                    |                                    |                                                               |                                                                                                                    |                                                                                                                                                                                                                                                                                                                                                                 |
|-------------------------------|--------------------------------------------------------------------------------------------------------------------------|------------------------------------------------------------------------------------------------------------------------------------------------------------------------------------------------------------------------------------------------------------------------------------------------------------------------------------------------------------------------------------------------------------------------------------------------------------------------------------------------------------------------------------------------------------------------------------------------|----------------------------------------------------------------------------------------------------------------------------------------------------|------------------------------------|---------------------------------------------------------------|--------------------------------------------------------------------------------------------------------------------|-----------------------------------------------------------------------------------------------------------------------------------------------------------------------------------------------------------------------------------------------------------------------------------------------------------------------------------------------------------------|
|                               |                                                                                                                          | <i>Length of intervention period from baseline:</i><br>at least 6 months,<br>maximum of 12 months                                                                                                                                                                                                                                                                                                                                                                                                                                                                                              |                                                                                                                                                    |                                    |                                                               |                                                                                                                    |                                                                                                                                                                                                                                                                                                                                                                 |
| Windsor<br>1988 <sup>63</sup> | Adult smokers living in Birmingham, USA; 95 in intervention group 1, 94 in intervention group 2 and 95 in control group. | <p><i>Direction:</i> reward</p> <p><i>Form:</i> cash</p> <p><i>Magnitude (Total value of incentive payments 2011 \$US):</i> \$95.10</p> <p><i>Certainty:</i> certain</p> <p><i>Target:</i> outcome</p> <p><i>Frequency:</i> some instances incentivised (when cessation verified)</p> <p><i>Immediacy:</i> at 6 weeks and at 6 months</p> <p><i>Schedule:</i> fixed</p> <p><i>Recipient:</i> individual</p> <p><i>Recruitment setting:</i> community – workplace</p> <p><i>Delivery setting:</i> community – workplace</p> <p><i>Length of intervention period from baseline:</i> 6 months</p> | Four intervention arms: self-help & skills training (group 1); self-help & incentives (group 2); self-help, skills training & incentives (group 3) | Usual care (self-help manual only) | Smoking cessation verified by salivary thiocyanate <100µg/ml. | Four-arm RCT, with follow-up at 6 weeks, 6 months and 12 months; those lost to follow up assumed not to have quit. | <p>Inconsistent results shown at the 6-week follow-up, and so it was concluded that the monetary incentives would not have an effect at 6 months.</p> <p>Chi-square analysis revealed no significant difference between control and group 2 (p=0.347) or between groups 1 and 3 (p=0.306) at the 6-week point.</p> <p>Smoking cessation at 6 months control</p> |

|                                          |                                                                                                                     |                                                                                                                                                                                                                                                                                                                                                                                                                                                                                                      |      |                 |                                              |                                                    |                                                                                                                                   |
|------------------------------------------|---------------------------------------------------------------------------------------------------------------------|------------------------------------------------------------------------------------------------------------------------------------------------------------------------------------------------------------------------------------------------------------------------------------------------------------------------------------------------------------------------------------------------------------------------------------------------------------------------------------------------------|------|-----------------|----------------------------------------------|----------------------------------------------------|-----------------------------------------------------------------------------------------------------------------------------------|
|                                          |                                                                                                                     |                                                                                                                                                                                                                                                                                                                                                                                                                                                                                                      |      |                 |                                              |                                                    | 7%, Group 1 8%, Group 2 20%, Group 3 12%; at 12 months control 6%, Group 1 5%, Group 2 19% and Group 3 5%.                        |
| <b>Vaccination &amp; Screening</b>       |                                                                                                                     |                                                                                                                                                                                                                                                                                                                                                                                                                                                                                                      |      |                 |                                              |                                                    |                                                                                                                                   |
| Debari and Servodidio 2007 <sup>47</sup> | Adults attending for breast and cervical cancer screening, living in Connecticut, USA; unknown participant numbers. | <p><i>Direction:</i> reward</p> <p><i>Form:</i> vouchers for restricted range of goods/services</p> <p><i>Magnitude (Total value of incentive payments 2011 \$US):</i> \$5.42</p> <p><i>Certainty:</i> certain</p> <p><i>Target:</i> process (maintained appointment or not)</p> <p><i>Frequency:</i> all instances incentivised (one-off)</p> <p><i>Immediacy:</i> on attendance</p> <p><i>Schedule:</i> fixed (one-off)</p> <p><i>Recipient:</i> individual</p> <p><i>Recruitment setting:</i></p> | None | No intervention | Attendance for breast or cervical screening. | Two-arm RCT, with follow-up as one-off attendance. | No difference in attendance rates between intervention vs. control group. Attendance rates or tests of significance not reported. |

|                                  |                                                                                                                                                                                                                            |                                                                                                                                                                                                                                                                                                                                                                                                                                                                                                                                              |                                                                                                                                                                |                         |                                            |                                                           |                                                                                                                                                                                                                                   |
|----------------------------------|----------------------------------------------------------------------------------------------------------------------------------------------------------------------------------------------------------------------------|----------------------------------------------------------------------------------------------------------------------------------------------------------------------------------------------------------------------------------------------------------------------------------------------------------------------------------------------------------------------------------------------------------------------------------------------------------------------------------------------------------------------------------------------|----------------------------------------------------------------------------------------------------------------------------------------------------------------|-------------------------|--------------------------------------------|-----------------------------------------------------------|-----------------------------------------------------------------------------------------------------------------------------------------------------------------------------------------------------------------------------------|
|                                  |                                                                                                                                                                                                                            | <p>outpatient</p> <p><i>Delivery setting:</i><br/>outpatient</p> <p><i>Length of intervention period from baseline:</i><br/>One-off attendance</p>                                                                                                                                                                                                                                                                                                                                                                                           |                                                                                                                                                                |                         |                                            |                                                           |                                                                                                                                                                                                                                   |
| Malotte et al 1998 <sup>55</sup> | <p>Adults attending for TB skin test reading, living in California, USA; 203 in intervention group 1, 198 in intervention group 2, 100 in control group, 204 in intervention group 4, and 200 in intervention group 5.</p> | <p><i>Direction:</i> reward</p> <p><i>Form:</i> cash</p> <p><i>Magnitude (Total value of incentive payments 2011 \$US):</i> \$6.90-\$13.80 (depending on intervention group)</p> <p><i>Certainty:</i> certain</p> <p><i>Target:</i> process (education session) &amp; outcome (attendance)</p> <p><i>Frequency:</i> all instances incentivised (one-off)</p> <p><i>Immediacy:</i> on attendance</p> <p><i>Schedule:</i> fixed (one-off)</p> <p><i>Recipient:</i> individual</p> <p><i>Recruitment setting:</i> community – not workplace</p> | <p>Five intervention arms: \$10 plus motivational education (group 1), \$5 plus motivational education (group 2), \$5 only (group 4), \$10 only (group 5).</p> | <p>No intervention.</p> | <p>Attendance for TB skin test reading</p> | <p>Six-arm RCT, with follow-up as one-off attendance.</p> | <p>Attendance was higher for those receiving an incentive (significance tests not reported).</p> <p>Attendance: 92.1% in group 1, 84.3% in group 2, 34.3% in group 3, 33% in control group, 85.8% in group 4, 93% in group 5.</p> |

|                                  |                                                                                                                                                                                        |                                                                                                                                                                                                                                                                                                                                                                                                                                                                                             |                                                                                                                                |                 |                                     |                                                     |                                                                                                                                                                                                                         |
|----------------------------------|----------------------------------------------------------------------------------------------------------------------------------------------------------------------------------------|---------------------------------------------------------------------------------------------------------------------------------------------------------------------------------------------------------------------------------------------------------------------------------------------------------------------------------------------------------------------------------------------------------------------------------------------------------------------------------------------|--------------------------------------------------------------------------------------------------------------------------------|-----------------|-------------------------------------|-----------------------------------------------------|-------------------------------------------------------------------------------------------------------------------------------------------------------------------------------------------------------------------------|
|                                  |                                                                                                                                                                                        | <p><i>Delivery setting:</i> community – not workplace</p> <p><i>Length of intervention period from baseline:</i> return for skin test reading within four days (96 hours)</p>                                                                                                                                                                                                                                                                                                               |                                                                                                                                |                 |                                     |                                                     |                                                                                                                                                                                                                         |
| Malotte et al 1999 <sup>56</sup> | Adults attending for TB skin test reading, living in California, USA; 217 in intervention group 1, 217 in intervention group 2, 218 in intervention group 3, and 215 in control group. | <p><i>Direction:</i> reward</p> <p><i>Form:</i> cash or vouchers for restricted range of goods/services</p> <p><i>Magnitude (Total value of incentive payments 2011 \$US):</i> \$\$13.50</p> <p><i>Certainty:</i> certain</p> <p><i>Target:</i> process (education session) &amp; outcome (attendance)</p> <p><i>Frequency:</i> all instances incentivised (one-off)</p> <p><i>Immediacy:</i> on attendance</p> <p><i>Schedule:</i> fixed (one-off)</p> <p><i>Recipient:</i> individual</p> | Four intervention arms: \$10 cash (group 1), \$10 grocery store coupon (group 2), \$10 bus pass or fast-food coupon (group 3). | No intervention | Attendance for TB skin test reading | Five-arm RCT, with follow-up as one-off attendance. | Statistically significant differences in attendance were found between group 1 and group 2 (p=0.002) and between group 1 and group 3 (p<0.001). Attendance: group 1 94.9%, group 2 85.7%, group 3 82.6%, control 49.3%. |

|                                 |                                                                                                                          |                                                                                                                                                                                                                                                                                                                                                                                                                                   |      |                                    |                                                                                                       |                                                              |                                                                                                                                                                                               |
|---------------------------------|--------------------------------------------------------------------------------------------------------------------------|-----------------------------------------------------------------------------------------------------------------------------------------------------------------------------------------------------------------------------------------------------------------------------------------------------------------------------------------------------------------------------------------------------------------------------------|------|------------------------------------|-------------------------------------------------------------------------------------------------------|--------------------------------------------------------------|-----------------------------------------------------------------------------------------------------------------------------------------------------------------------------------------------|
|                                 |                                                                                                                          | <p><i>Recruitment setting:</i> community – not workplace</p> <p><i>Delivery setting:</i> community – not workplace</p> <p><i>Length of intervention period from baseline:</i> return for skin test reading within four days (96 hours)</p>                                                                                                                                                                                        |      |                                    |                                                                                                       |                                                              |                                                                                                                                                                                               |
| Nowalk et al 2010 <sup>57</sup> | Adults attending for influenza vaccination. Appears to be a US study; 3757 in control group, 4387 in intervention group. | <p><i>Direction:</i> reward</p> <p><i>Form:</i> vouchers for restricted range of goods/services</p> <p><i>Magnitude (Total value of incentive payments 2011 \$US):</i> \$5.16</p> <p><i>Certainty:</i> certain</p> <p><i>Target:</i> outcome</p> <p><i>Frequency:</i> all instances incentivised (one-off)</p> <p><i>Immediacy:</i> on attendance</p> <p><i>Schedule:</i> fixed (one-off)</p> <p><i>Recipient:</i> individual</p> | None | Usual care (influenza advertising) | Attendance for influenza vaccination (change in vaccination rate from baseline to intervention year). | Three arm cluster RCT; with follow-up as one-off attendance. | Average change in vaccination rate from previous to current year significant in intervention group (p<0.005). Attendance for vaccination: 11.1% in intervention group, 4.7% in control group. |

|                            |                                                                                                                 |                                                                                                                                                                                                                                                                                                                                                                                                                                                                   |      |            |                                    |                                                                  |                                                                                                                                                                           |
|----------------------------|-----------------------------------------------------------------------------------------------------------------|-------------------------------------------------------------------------------------------------------------------------------------------------------------------------------------------------------------------------------------------------------------------------------------------------------------------------------------------------------------------------------------------------------------------------------------------------------------------|------|------------|------------------------------------|------------------------------------------------------------------|---------------------------------------------------------------------------------------------------------------------------------------------------------------------------|
|                            |                                                                                                                 | <p><i>Recruitment setting:</i><br/>community – workplace</p> <p><i>Delivery setting:</i><br/>community – workplace</p> <p><i>Length of intervention period from baseline:</i><br/>return for influenza vaccination within 12 month period</p>                                                                                                                                                                                                                     |      |            |                                    |                                                                  |                                                                                                                                                                           |
| Stitzer 2010 <sup>58</sup> | Adults attending for Hepatitis B vaccination, living in the USA; 13 in intervention group, 13 in control group. | <p><i>Direction:</i> reward</p> <p><i>Form:</i> cash &amp; specific goods/services</p> <p><i>Magnitude (Total value of incentive payments 2011 \$US):</i> \$273 (certain component), at least \$16,800 (chance component)</p> <p><i>Certainty:</i> certain &amp; certain chance</p> <p><i>Target:</i> process (study procedures) &amp; outcome (vaccinations)</p> <p><i>Frequency:</i> all instances incentivised (on attendance)</p> <p><i>Immediacy:</i> on</p> | None | Usual care | Attendance for vaccination series. | Two-arm RCT; with follow-up as attendance at vaccination series. | Attendance for all injections was significantly higher in intervention vs. control group (p=0.107). Attendance for all injections in incentive group 77% vs. control 46%. |

|                                      |                                                                                                                                         |                                                                                                                                                                                                                                                                                                                                                    |      |                 |                                                               |                                                                                                                           |                                                                                                                                                                                  |
|--------------------------------------|-----------------------------------------------------------------------------------------------------------------------------------------|----------------------------------------------------------------------------------------------------------------------------------------------------------------------------------------------------------------------------------------------------------------------------------------------------------------------------------------------------|------|-----------------|---------------------------------------------------------------|---------------------------------------------------------------------------------------------------------------------------|----------------------------------------------------------------------------------------------------------------------------------------------------------------------------------|
|                                      |                                                                                                                                         | <p>attendance<br/> <i>Schedule:</i> variable<br/> <i>Recipient:</i> individual<br/> <i>Recruitment setting:</i> community – not workplace &amp; clinical - outpatient<br/> <i>Delivery setting:</i> community – not workplace<br/> <i>Length of intervention period from baseline:</i> over 24 weeks (injections at weeks 2, 4, 8, 12, 16, 20)</p> |      |                 |                                                               |                                                                                                                           |                                                                                                                                                                                  |
| <b>Physical Activity</b>             |                                                                                                                                         |                                                                                                                                                                                                                                                                                                                                                    |      |                 |                                                               |                                                                                                                           |                                                                                                                                                                                  |
| Finkelstein et al 2008 <sup>49</sup> | Adults participating in a physical activity intervention, living in North Carolina, USA; 35 in intervention group, 35 in control group. | <p><i>Direction:</i> reward<br/> <i>Form:</i> cash<br/> <i>Magnitude (Total value of incentive payments 2011 \$US):</i> \$104<br/> <i>Certainty:</i> certain<br/> <i>Target:</i> process (attendance at meeting) &amp; outcome (behaviour)<br/> <i>Frequency:</i> all instances incentivised</p>                                                   | None | No intervention | Wearing a pedometer and logging minutes of physical activity. | Two-arm RCT; with follow-up at the end of the four-week intervention period (21 in incentive group, 30 in control group). | Controlling for socio-demographics, significantly more daily physical activity in intervention vs. control group (p<0.001). Minutes of physical activity per week: 35 minutes in |



|  |  |                                                                                                                                                                                                                                                                                                                                 |  |  |  |  |                                                               |
|--|--|---------------------------------------------------------------------------------------------------------------------------------------------------------------------------------------------------------------------------------------------------------------------------------------------------------------------------------|--|--|--|--|---------------------------------------------------------------|
|  |  | <p>(using a pedometer)</p> <p><i>Immediacy:</i> each week</p> <p><i>Schedule:</i> variable</p> <p><i>Recipient:</i> individual</p> <p><i>Recruitment setting:</i> community – not workplace</p> <p><i>Delivery setting:</i> community – not workplace</p> <p><i>Length of intervention period from baseline:</i> four weeks</p> |  |  |  |  | <p>intervention groups vs. 19.5 minutes in control group.</p> |
|--|--|---------------------------------------------------------------------------------------------------------------------------------------------------------------------------------------------------------------------------------------------------------------------------------------------------------------------------------|--|--|--|--|---------------------------------------------------------------|
